# Supplementary material for: Consumer and Relationship Factors Associated With Shared Decision Making in Mental Health Consultations
Source: Atypon-hosted journal article supplement (doi:10.1176/appi.ps.201300563), 2014-12-01
Supplement: appi.ps.201300563.ds001.pdf [file appi.ps.201300563.ds001.pdf]

## Appendix: The Shared Decision-Making (SDM) Scale—Elements and Scoring

### 9 Elements:

- 1) discussion of the consumer's role in decision making,
- 2) discussion of the consumer's goal / context of decision,
- 3) discussion of the clinical issue or nature of the decision,
- 4) discussion of alternatives,
- 5) discussion of pros and cons relevant to the decision,
- 6) discussion of uncertainties associated with the decision (e.g., likelihood/probability of success),
- 7) assessment of consumer understanding,
- 8) assessment of consumer's desire for others' input,
- 9) exploration of the consumer's preferences.

Each item is scored as absent (0), partial (1), or complete (2), depending on the extent of discussion.
